# Supplementary material for: Association of Maternal Regulatory Single Nucleotide Polymorphic CD99 Genotype with Preeclampsia in Pregnancies Carrying Male Fetuses in Ethiopian Women
Source: PubMed Central journal article supplement (PMC7461595; doi:10.3390/ijms21165837), 2020-08-14
Supplement: ijms-21-05837-s001.pdf [file ijms-21-05837-s001.pdf]

**Supplementary information:**

**Association of maternal regulatory single nucleotide polymorphic CD99 genotype with preeclampsia in pregnancies carrying male fetuses in Ethiopian women**

Tsehayneh Kelemu<sup>a</sup>, Lena Erlandsson<sup>b</sup>, Daniel Seifu<sup>a,c</sup>, Markos Abebe<sup>d</sup>, Sisay Teklu<sup>e</sup>, Jill R. Storry<sup>f</sup> and Stefan R. Hansson<sup>b\*</sup>

**Table 1.** Frequency distribution of SNP rs311103 genotypes among maternal subgroups.

| Maternal Genotype | Maternal groups                 |                                      |                                   |                                        |
|-------------------|---------------------------------|--------------------------------------|-----------------------------------|----------------------------------------|
|                   | PE mothers of males<br>% (n=51) | Control mothers of males<br>% (n=77) | PE mothers of females<br>% (n=54) | Control mothers of females<br>% (n=59) |
| GG                | 41.2 (21)                       | 36.4 (28)                            | 40.8 (22)                         | 40.7 (24)                              |
| GC                | 51.0 (26)                       | 42.8 (33)                            | 37.0 (20)                         | 40.7 (24)                              |
| CC                | 7.8 (4)                         | 20.8 (16)                            | 22.2 (12)                         | 18.6 (11)                              |

*PE-preeclampsia*

**Table S2.** Frequency distribution of SNP sr311103 genotypes among fetal subgroups.

| Fetal genotype | Males of PE mothers<br>% (n=51) | Males of control mothers<br>% (n=77) | Females of PE mothers<br>% (n=54) | Females of control mothers<br>% (n=59) |
|----------------|---------------------------------|--------------------------------------|-----------------------------------|----------------------------------------|
| GG             | 31.4 (16)                       | 29.9 (23)                            | 40.8 (22)                         | 30.5 (18)                              |
| GC             | 49.0 (25)                       | 46.7 (36)                            | 37.0 (20)                         | 49.2 (29)                              |
| CC             | 19.6 (10)                       | 23.4 (18)                            | 22.2 (12)                         | 20.3 (12)                              |

*PE-preeclampsia*

**Table S3.** Male fetus genotype versus mother genotype.

| Male genotype | PE mother genotype |    |    | Control mother genotype |    |    |
|---------------|--------------------|----|----|-------------------------|----|----|
|               | CC                 | GC | GG | CC                      | GC | GG |
| CC            | 3                  | 7  | 0  | 11                      | 7  | 0  |
| GC            | 1                  | 13 | 11 | 5                       | 19 | 12 |
| GG            | 0                  | 6  | 10 | 0                       | 7  | 16 |

*PE-preeclampsia*

**Table S4.** Female fetus genotype versus mother genotype.

| Female genotype | PE mother genotype |    |    | Control mother genotype |    |    |
|-----------------|--------------------|----|----|-------------------------|----|----|
|                 | CC                 | GC | GG | CC                      | GC | GG |
| CC              | 8                  | 4  | 0  | 5                       | 7  | 0  |
| GC              | 4                  | 7  | 9  | 6                       | 13 | 10 |
| GG              | 0                  | 9  | 13 | 0                       | 4  | 14 |

*PE-preeclampsia*
